# Supplementary material for: Peritoneal or mesenteric tumours revealing histiocytosis
Source: PubMed Central journal article supplement — BMJ Open Gastroenterol. 2021 May 21;8(1):e000622. doi: 10.1136/bmjgast-2021-000622 (PMC8144026; doi:10.1136/bmjgast-2021-000622), 2021-05-21
Supplement: bmjgast-2021-000622supp001.pdf [file bmjgast-2021-000622supp001.pdf]

## Supplementary data

Supplementary figure 1: Characteristics of previously reported patients with ECD and sclerosing mesenteritis.

| Author (year)      | Nb of patient | Gender                           | Age                                 | Main symptom                                                               | Abdominal symptoms                                   | ECD location                                                                                                                                                                                                                                               | Tissue disclosing ECD                                   | BRAF <sup>V600E</sup>                     | Mutation detected                          | Treatment                                                                                                                | Outcome (at publication)                                                                             |
|--------------------|---------------|----------------------------------|-------------------------------------|----------------------------------------------------------------------------|------------------------------------------------------|------------------------------------------------------------------------------------------------------------------------------------------------------------------------------------------------------------------------------------------------------------|---------------------------------------------------------|-------------------------------------------|--------------------------------------------|--------------------------------------------------------------------------------------------------------------------------|------------------------------------------------------------------------------------------------------|
| Tan (1995)         | 1             | F                                | 59                                  | Abdominal swelling                                                         | Abdominal swelling                                   | Bones, kidney, heart, mesentery, breast                                                                                                                                                                                                                    | Breast, pericardium                                     | NA                                        | NA                                         | Cyclophosphamide/vincristine/prednisone                                                                                  | NA                                                                                                   |
| Kang (2003)        | 1             | M                                | 53                                  | Dyspnea                                                                    | No                                                   | Bones, heart, lung, mesentery                                                                                                                                                                                                                              | Pleura                                                  | NA                                        | NA                                         | NA                                                                                                                       | Dead                                                                                                 |
| Perlat (2009)      | 1             | M                                | 31                                  | Bone pain                                                                  | No                                                   | Bones, skin, mesentery                                                                                                                                                                                                                                     | Skin, mesentery                                         | NA                                        | NA                                         | Prednisone/Cladribine Interferon                                                                                         | Died from infection                                                                                  |
| Lamboley (2010)    | 1             | M                                | 55                                  | Abdominal pain                                                             | Abdominal pain                                       | Bones, kidney, vascular, mesentery                                                                                                                                                                                                                         | Mesentery                                               | NA                                        | NA                                         | NA                                                                                                                       | NA                                                                                                   |
| Pan (2011)         | 1             | M                                | 69                                  | Vomiting                                                                   | Vomiting                                             | Bone, kidney, vascular, lung, mesentery                                                                                                                                                                                                                    | Liver, omentum mesentery                                | NA                                        | NA                                         | Prednisone                                                                                                               | Died of respiratory failure                                                                          |
| Sedrak (2011)      | 1             | M                                | 60                                  | Ascites                                                                    | Ascites                                              | Skull base, mesentery, kidney                                                                                                                                                                                                                              | Bone marrow                                             | NA                                        | NA                                         | NA                                                                                                                       | NA                                                                                                   |
| Haroche (2012)     | 1 (mixed LCH) | W                                | 59                                  | Bone pain                                                                  | No                                                   | Bones, kidney, heart, vascular, orbit, mesentery                                                                                                                                                                                                           | Mesentery                                               | BRAF                                      | none                                       | Interferon-alpha Vemurafenib                                                                                             | Alive with disease                                                                                   |
| Gilortega (2013)   | 1             | M                                | 45                                  | Diarrhea                                                                   | Diarrhea                                             | Bones, kidney, mesentery                                                                                                                                                                                                                                   | Tibia                                                   | NA                                        | NA                                         | Interferon-alpha                                                                                                         | Alive with disease                                                                                   |
| Emile (2014)       | 1             | M                                | 54                                  | NA                                                                         | NA                                                   | Mesentery                                                                                                                                                                                                                                                  | Mesentery                                               | W-t                                       | None                                       | NA                                                                                                                       | Alive with disease                                                                                   |
| Gianfreda (2015)   | 4             | #1: M<br>#2: F<br>#3: F<br>#4: M | #1:68<br>#2: 38<br>#3: 42<br>#4: 46 | #1: Constitutional signs<br>#2: Skins<br>#3: Bone pain<br>#4: Pericarditis | #1: pain/vomiting<br>#2: no<br>#3: ascites<br>#4: no | #1: Bones, kidney, vascular, mesentery<br>#2: Bones, vascular, mesentery, pituitary, CNS, skins<br>#3: Bones, cardiac, vascular, mesentery, endocrine system, lung, lymph node<br>#4: Bones, cardiac, vascular, kidney, mesentery, orbit, endocrine system | #1: NA<br>#2: Skin<br>#3: Kidney and node<br>#4: Kidney | #1: w-t<br>#2: w-t<br>#3: BRAF<br>#4: w-t | #1: NA<br>#2: none<br>#3: none<br>#4: none | #1: Sirolimus/prednisone<br>#2: Sirolimus/prednisone<br>#3: Sirolimus/prednisone Vemurafenib<br>#4: Sirolimus/prednisone | #1: Alive with disease<br>#2: Alive with disease<br>#3: Alive with disease<br>#4: Alive with disease |
| Franconieri (2016) | 1             | F                                | 76                                  | Constitutional signs                                                       | NA                                                   | Bones, kidney, mesentery, vascular, orbital, pituitary, pleural, pericardial                                                                                                                                                                               | Retro-orbital                                           | W-t                                       | NA                                         | Anakinra Interferon-alpha Canakinumab Vemurafenib                                                                        | Alive with disease                                                                                   |
| Goyal (2017)       | 1             | M                                | 76                                  | NA                                                                         | NA                                                   | Bone, bone marrow, CNS, orbit, sinus, kidney, mesentery                                                                                                                                                                                                    | NA                                                      | NA                                        | NA                                         | Prednisone Anakinra                                                                                                      | Alive with disease                                                                                   |
| Franconieri (2018) | 2             | #1:M<br>#2:M                     | #1:68<br>#2:52                      | #1: Constitutional signs<br>#2: Constitutional signs                       | #1: yes<br>#2: yes                                   | #1: Bone, kidney, cardiac, pleural, mesentery<br>#2: Bone, kidney, cardiac, pleural, mesentery                                                                                                                                                             | #1: kidney, mesentery<br>#2: kidney, mesentery          | #1: w-t<br>#2: BRAF                       | #1: NRAS                                   | #1: Interferon-alpha Anakinra<br>#2: Steroids-vinblastine Anakinra                                                       | #1: Alive with disease<br>#2: Alive with disease                                                     |
| Nikpanah (2018)    | 4             | NA                               | NA                                  | NA                                                                         | NA                                                   | NA                                                                                                                                                                                                                                                         | Mesentery in one                                        | NA                                        | NA                                         | NA                                                                                                                       | NA                                                                                                   |

w-t: wild type, CNS: central nervous system; NA: non-available
